# Supplementary material
Source: PubMed Central journal article supplement (PMC283588)
Supplement: pnas_100_24_14309__1.pdf [file pnas_100_24_14309__1.pdf]

**Table 2. Primers used for real-time PCR analysis**

| <b>Gene Name</b>     | <b>Forward Primer</b>  | <b>Reverse Primer</b>  |
|----------------------|------------------------|------------------------|
| GAPDH                | TGCCCCCATGTTTGTGATG    | TGTGGTCATGAGCCCTTCC    |
| CIITA                | CACCCCCAGATGTGTATGTGC  | CGAGGTTTCCCAGTCCAGAAG  |
| H-2DMa               | GCCATTGCATTTGACAAAAGC  | GGCAAACCTCTGGACACTGG   |
| GBP-2                | GCACAGGCAAATCCTACCTGAT | GATGCCCTTGGTGTGAGACTG  |
| li                   | CCAAGTACGGCAACATGACCCA | CAGTTCACGCCATCCATGGAGT |
| 18S                  | CGCCGCTAGAGGTGAAATTCT  | CGAACCTCCGACTTTCGTTCT  |
| Sca1                 | CTTGCCCATCAATTACCTGCC  | GGAGGGCAGATGGGTAAGCAA  |
| IRF1                 | ACACTAAGAGCAAACCAAGAG  | TTCCATATCCAAGTCCTGA    |
| Spi2                 | ATGGAAGAACCCTTTGACCCG  | GGACAGCTCCTCATCCCGGAA  |
| MIG                  | ATAAGGAATGCACGATGCT    | TCAGTTTTGTTGCAATTGG    |
| Stat1                | CTCTTAGCTTTGAAACCCAGTT | TTGTACCACAGGATAGACGC   |
| MCMV gB              | CGCGACTGAGAATGGTAC     | TCCTTGAGCACGTCGTAG     |
| CIITA promoter IV 5' | GGTTGCATGTGGCAGCTTCT   | CCCTCCTCCCCTGAAAAGTG   |
| CIITA 3' UTR         | GGAACACTGACCATGCTGGA   | TGGCCACAGAAAAGCTGAG    |
| beta-actin promoter  | GTGACGAAGCCCAGAGCAA    | CTGCCCAGTTGGTGACAATG   |
| Mg11 promoter        | TGCCCTCTTTGGCCTTGTC    | TTCTCCGAAAGGGTGGTGT    |
